# Supplementary material for: Predicting prognosis and immune responses in hepatocellular carcinoma based on N7-methylguanosine-related long noncoding RNAs
Source: Front Genet. 2022 Aug 30;13:930446. doi: 10.3389/fgene.2022.930446 (PMC9468367; doi:10.3389/fgene.2022.930446)
Supplement: Supplementary file 9 [file Table8.XLSX]

## Sheet: KEGG
ID	Description	GeneRatio	BgRatio	pvalue	p.adjust	qvalue	geneID	Count
hsa04110	Cell cycle	28/328	126/8158	6.1995e-14	1.80406e-11	1.65755e-11	CDC25C/BUB1/TTK/SFN/TGFB1/CCNB2/CDC25A/CDKN1C/BUB1B/ORC6/MAD2L1/ORC1/CDKN2A/CHEK1/CCNB1/MCM2/PKMYT1/CDC20/CDK1/MCM4/PLK1/RBL1/MCM6/E2F2/CDC6/PTTG1/CDC45/TGFB2	28
hsa00980	Metabolism of xenobiotics by cytochrome P450	13/328	78/8158	1.17383e-05	0.00135507	0.00124502	CYP3A4/CYP2B6/GSTM1/UGT2B11/CYP2A7/ADH1C/ADH4/HSD11B1/ALDH3A1/CYP2A6/CYP2A13/UGT1A10/DHDH	13
hsa00830	Retinol metabolism	12/328	68/8158	1.39698e-05	0.00135507	0.00124502	RDH16/CYP3A4/CYP2B6/UGT2B11/CYP26B1/CYP2A7/CYP2C8/ADH1C/ADH4/CYP26A1/CYP2A6/UGT1A10	12
hsa05204	Chemical carcinogenesis - DNA adducts	11/328	69/8158	8.4578e-05	0.00615305	0.00565337	CYP3A4/GSTM1/NAT2/UGT2B11/CYP2A7/CYP2C8/CYP3A43/HSD11B1/CYP2A6/CYP2A13/UGT1A10	11
hsa00982	Drug metabolism - cytochrome P450	11/328	72/8158	0.000125845	0.00732419	0.00672941	CYP3A4/CYP2B6/GSTM1/UGT2B11/CYP2A7/CYP2C8/ADH1C/ADH4/ALDH3A1/CYP2A6/UGT1A10	11
hsa04114	Oocyte meiosis	15/328	131/8158	0.000232953	0.0112982	0.0103807	MAPK13/CDC25C/BUB1/CCNB2/SGO1/MAD2L1/SPDYC/CCNB1/PKMYT1/CDC20/CDK1/PLK1/ITPR3/PTTG1/ADCY1	15
hsa04914	Progesterone-mediated oocyte maturation	12/328	102/8158	0.000760874	0.0316306	0.0290619	MAPK13/CDC25C/BUB1/CCNB2/CDC25A/MAD2L1/SPDYC/CCNB1/PKMYT1/CDK1/PLK1/ADCY1	12
hsa00983	Drug metabolism - other enzymes	10/328	80/8158	0.00129618	0.0471487	0.0433198	UPP2/CYP3A4/GSTM1/NAT2/UGT2B11/CYP2A7/IMPDH1/CYP2A6/RRM2/UGT1A10	10
hsa04218	Cellular senescence	15/328	156/8158	0.00148197	0.0479171	0.0440259	MAPK13/TGFB1/CCNB2/CDC25A/CDKN2A/CHEK1/FOXM1/CCNB1/SQSTM1/MYBL2/CDK1/RBL1/ITPR3/E2F2/TGFB2	15
hsa04115	p53 signaling pathway	9/328	73/8158	0.00246897	0.071847	0.0660124	SFN/CCNB2/CDKN2A/CHEK1/CCNB1/CDK1/RRM2/PMAIP1/GTSE1	9
hsa00565	Ether lipid metabolism	7/328	49/8158	0.00319412	0.0844989	0.0776369	GAL3ST1/PLA2G7/PAFAH1B3/LPCAT1/PLA2G1B/GDPD3/PLPP2	7
hsa05323	Rheumatoid arthritis	10/328	93/8158	0.00401617	0.0971161	0.0892295	IL18/TGFB1/ATP6V0D2/MMP1/TNFRSF11A/CCL20/CXCL1/CXCL5/IL11/TGFB2	10
hsa04657	IL-17 signaling pathway	10/328	94/8158	0.00433852	0.0971161	0.0892295	MAPK13/MMP1/IKBKE/CCL20/S100A8/MMP9/CXCL1/CXCL5/MUC5B/S100A9	10
hsa00010	Glycolysis / Gluconeogenesis	8/328	67/8158	0.00516869	0.100941	0.0927434	PKM/ADH1C/ADH4/ENO2/ALDH3A1/PFKP/HK2/GCK	8
hsa03440	Homologous recombination	6/328	41/8158	0.00552157	0.100941	0.0927434	RAD51/XRCC2/EME1/BARD1/BLM/RAD54L	6
hsa03460	Fanconi anemia pathway	7/328	54/8158	0.00555	0.100941	0.0927434	RAD51/RMI2/FANCI/UBE2T/EME1/BLM/FANCD2	7
hsa05230	Central carbon metabolism in cancer	8/328	70/8158	0.00674398	0.115441	0.106066	SLC2A1/PKM/SLC1A5/PFKP/HK2/G6PD/GCK/SLC16A3	8
hsa00052	Galactose metabolism	5/328	31/8158	0.0073165	0.118283	0.108678	AKR1B1/PFKP/HK2/AKR1B10/GCK	5
hsa04974	Protein digestion and absorption	10/328	103/8158	0.00824668	0.122984	0.112997	COL9A2/SLC1A5/COL11A1/PRSS3/COL2A1/MEP1A/SLC6A19/CPA2/PRSS2/FXYD2	10
hsa04512	ECM-receptor interaction	9/328	88/8158	0.0086001	0.122984	0.112997	ITGA2/ITGA3/FRAS1/COL9A2/SPP1/SV2A/IBSP/COL2A1/HMMR	9
hsa04976	Bile secretion	9/328	89/8158	0.00924012	0.122984	0.112997	SLC2A1/CYP3A4/SLC10A1/UGT2B11/SLC27A5/UGT1A10/SLC22A1/FXYD2/ADCY1	9
hsa00051	Fructose and mannose metabolism	5/328	33/8158	0.00957292	0.122984	0.112997	AKR1B1/PFKFB4/PFKP/HK2/AKR1B10	5
hsa04930	Type II diabetes mellitus	6/328	46/8158	0.0097282	0.122984	0.112997	PKM/PDX1/KCNJ11/SOCS2/HK2/GCK	6
hsa01230	Biosynthesis of amino acids	8/328	75/8158	0.010143	0.122984	0.112997	TKT/PKM/BCAT1/PYCR1/TKTL1/ENO2/PFKP/SDS	8
hsa00040	Pentose and glucuronate interconversions	5/328	35/8158	0.0122669	0.142787	0.131191	AKR1B1/UGT2B11/UGT1A10/DHDH/AKR1B10	5
hsa00350	Tyrosine metabolism	5/328	36/8158	0.013789	0.148614	0.136546	ADH1C/IL4I1/ADH4/TAT/ALDH3A1	5
hsa00500	Starch and sucrose metabolism	5/328	36/8158	0.013789	0.148614	0.136546	GBA3/TREH/HK2/GYS2/GCK	5
hsa04060	Cytokine-cytokine receptor interaction	20/328	295/8158	0.0152577	0.158571	0.145694	IL18/TGFB1/INHA/PF4V1/TNFRSF11A/EPO/CXCL17/CCL20/CSF3R/CCL26/CXCL1/CXCL5/XCL1/LIF/TNFRSF18/GDF15/IL1RL2/IL11/GDF10/TGFB2	20
hsa01200	Carbon metabolism	10/328	115/8158	0.0171121	0.171711	0.157767	TKT/PKM/TKTL1/ENO2/HAO2/PFKP/HK2/G6PD/GCK/SDS	10
hsa04911	Insulin secretion	8/328	86/8158	0.0218682	0.212121	0.194895	SLC2A1/PDX1/KCNJ11/ITPR3/GCK/CREB3L1/FXYD2/ADCY1	8
hsa05207	Chemical carcinogenesis - receptor activation	15/328	212/8158	0.023693	0.222204	0.204159	ESR1/CHRNA4/CYP3A4/CDC25A/CYP2B6/IKBKE/GSTM1/UGT2B11/KLF5/KPNA2/UGT1A10/BIRC5/CDC6/CREB3L1/ADCY1	15
hsa00360	Phenylalanine metabolism	3/328	16/8158	0.0244348	0.222204	0.204159	IL4I1/TAT/ALDH3A1	3
hsa00120	Primary bile acid biosynthesis	3/328	17/8158	0.0288076	0.254031	0.233401	AKR1D1/SLC27A5/CYP8B1	3
hsa00030	Pentose phosphate pathway	4/328	30/8158	0.0308193	0.263777	0.242356	TKT/TKTL1/PFKP/G6PD	4
hsa04080	Neuroactive ligand-receptor interaction	22/328	362/8158	0.0343373	0.28549	0.262306	CHRNA4/OXTR/P2RY6/NPFFR2/GNRH2/NMB/SSTR2/NPW/VIPR1/NTS/PRSS3/LPAR2/ADORA1/GCGR/ADRA2C/ADRA1A/HTR1D/GPR35/AVPR1A/PRSS2/SSTR5/LYPD6B	22
hsa04068	FoxO signaling pathway	10/328	131/8158	0.0379371	0.306658	0.281755	MAPK13/TGFB1/CCNB2/FOXO6/HOMER1/CCNB1/PLK1/PLK4/HOMER3/TGFB2	10
hsa04640	Hematopoietic cell lineage	8/328	99/8158	0.0453198	0.356434	0.327489	ITGA2/ITGA3/EPO/CSF3R/FCGR1A/CD24/IL11/CD7	8
